# Supplementary material for: Three-dimensional tumor spheroids for in vitro analysis of bacteria as gene delivery vectors in tumor therapy
Source: PubMed Central journal article supplement (PMC4676896; doi:10.1186/s12934-015-0383-5), 2015-12-12
Supplement: 12934_2015_383_MOESM1_ESM.pdf [file 12934_2015_383_MOESM1_ESM.pdf]

1 **Figure S1: Characterisation of HT-29 MCTS.**

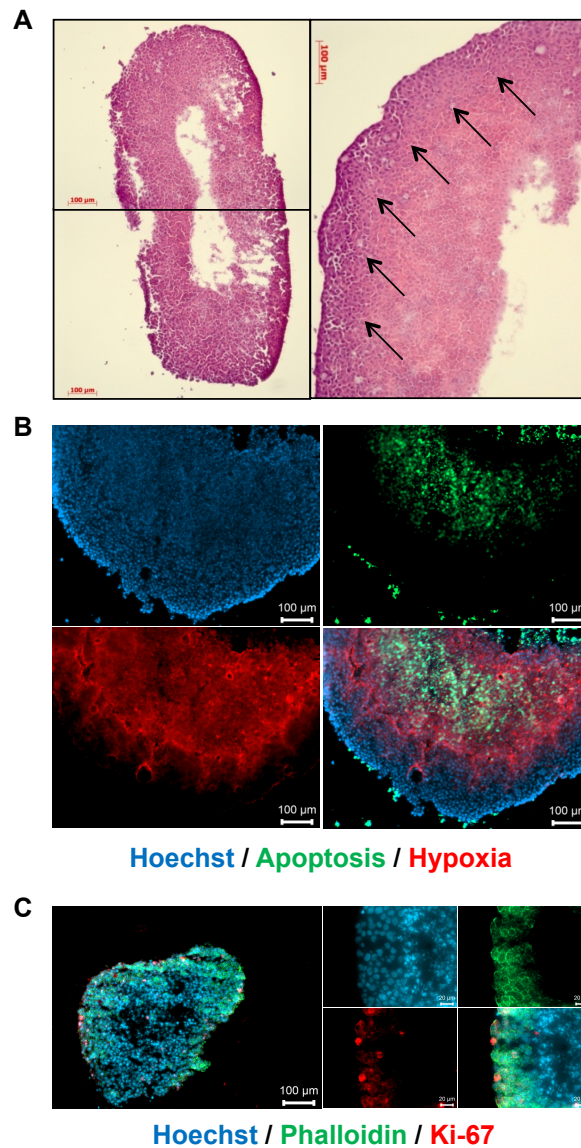

2

3 **Figure S1: Characterisation of HT-29 MCTS.** (A) H&E stained histological sections of  
4 representative MCTS formed by HT-29 cells cultured for 14 days. The two panels to the right  
5 are a composite of two adjacent fields of view. The image in the left panel is a zoom-in on a  
6 part of the same section. Arrows indicate areas of cells with intact nuclei stained with  
7 hematoxylin (purple) surrounding eosin-stained areas (pink). (B) and (C) Fluorescence  
8 microscopy of HT-29 MCTS cryosections. Nuclei were stained with Hoechst (blue). Staining  
9 in (B): hypoxia (pimonidazole and  $\alpha$ -pimonidazole antibody, red) and apoptosis (DNA strand

1 breaks by TUNEL, green). Staining in (C): proliferating cells ( $\alpha$ -Ki-67 antibody, red) and  
2 actin cytoskeleton (Alexa Fluor® 488 Phalloidin, green). The results clearly demonstrate that  
3 HT-29 MCTS display the typical tissue architecture of solid tumours with an outer zone of  
4 proliferating cells with intact nuclei and defined actin cytoskeleton and increasing hypoxia,  
5 apoptosis, necrosis and loss of structured cytoskeleton towards the core. Images were  
6 acquired with a Zeiss Axio Observer.Z1 microscope using a 10 $\times$  (all panels in A and B and  
7 left panel in C, scale bars 100  $\mu$ m), or a 40 $\times$  objective (small panels in C, scale bars: 20  $\mu$ m).
