# Supplementary material for: Three-dimensional tumor spheroids for in vitro analysis of bacteria as gene delivery vectors in tumor therapy
Source: PubMed Central journal article supplement (PMC4676896; doi:10.1186/s12934-015-0383-5), 2015-12-12
Supplement: 12934_2015_383_MOESM3_ESM.pdf [file 12934_2015_383_MOESM3_ESM.pdf]

1 **Figure S2: Characterization of HT-29 and HT-29/EGFP4 cells.**

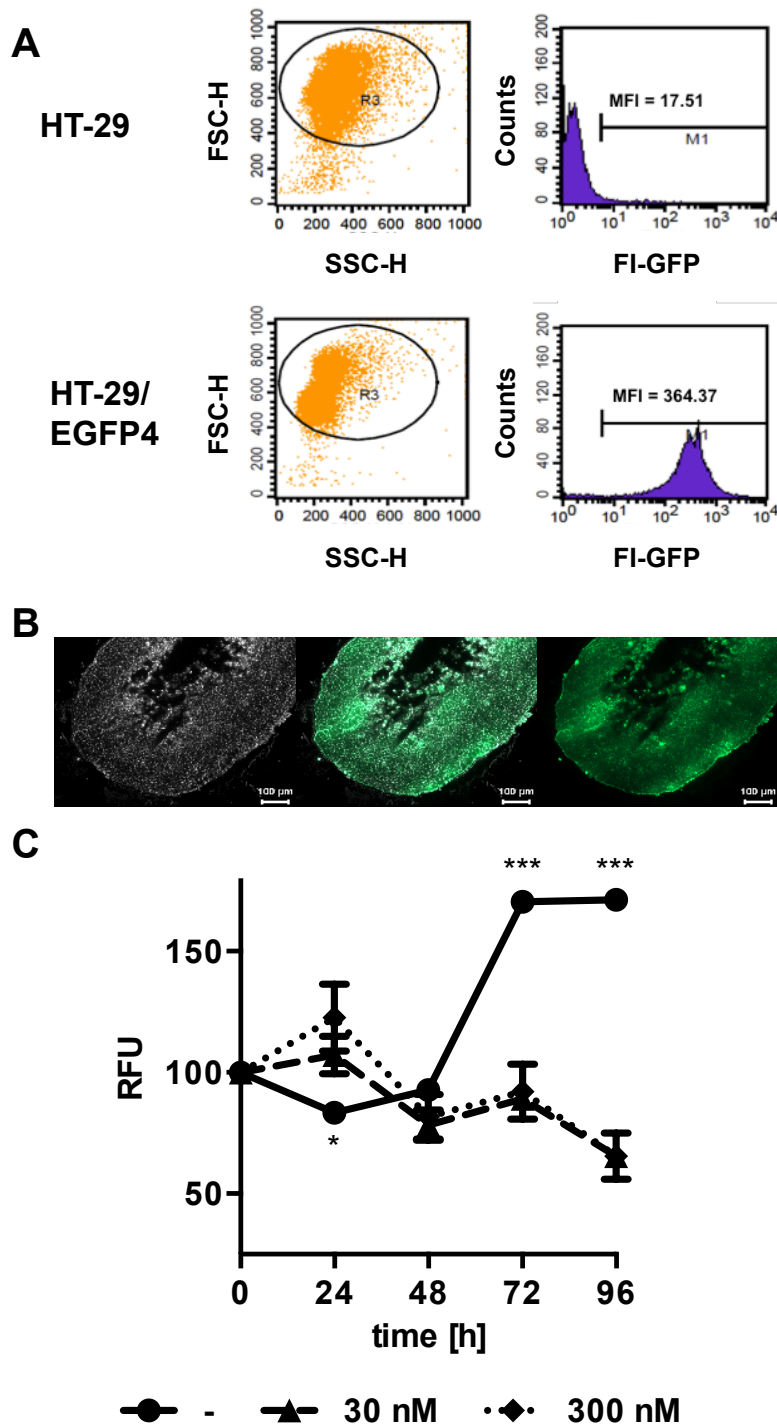

2

3 **Figure S2: Characterization of HT-29 and HT-29/EGFP4 cells.** (A) Parental HT-29 and  
 4 HT-29/EGFP4 cells were cultivated in 75 cm<sup>2</sup> tissue culture flasks to approx. 80 %  
 5 confluence and analysed by flow cytometry for size (forward scatter; FSC-H) and granularity  
 6 (side scatter, SSC-H; left panels). Healthy, live cells in gate R3 were used for analysis of

1 green fluorescence in the FL1 channel (FI-GFP; right panels) and mean fluorescence intensity  
2 (MFI) of the EGFP positive cells (M1). (B) Fluorescence microscopy of cryosections of HT-  
3 29/EGFP4 MCTS (upper panel: brightfield; lower panel: GFP channel; middle: merge).  
4 Images were acquired with a Zeiss Axio Observer.Z1 microscope using a 10× objective (scale  
5 bars: 100 μm). (C) Fluorescence of HT-29/EGFP4 MCTS during growth in the presence or  
6 absence of staurosporine (30 or 300 nM). Fluorescence intensities were normalized to give  
7 100% for each MCTS at the start of the experiment (t = 0 h). Values are relative fluorescent  
8 units (RFU) per MCTS and are mean ± SEM of three MCTS per condition. Results are from  
9 one representative of three independent experiments. Statistical analysis was performed using  
10 two-way ANOVA with Bonferroni post-test correction for multiple comparisons. Astersisk  
11 indicate levels of statistical significance of untreated compared to both treatment groups (\*:P  
12 < 0.05; \*\*\*: P < 0.001, all other comparisons not significant).
